# Supplementary material for: Polycondensed Peptide Carriers Modified with Cyclic RGD Ligand for Targeted Suicide Gene Delivery to Uterine Fibroid Cells
Source: MDPI journal article supplement (doi:10.3390/ijms23031164), 2022-01-21
Supplement: s1 [file s1]

# **Polycondensed peptide carriers modified with cyclic RGD ligand for targeted suicide gene delivery to uterine fibroid cells**

**Anna Egorova<sup>1</sup>, Sofia Shtykalova<sup>1</sup>, Marianna Maretina<sup>1</sup>, Natalia Shved<sup>1</sup>, Alexander Selutin<sup>2</sup>, Dmitriy Deviatkin<sup>1</sup>, Sergey Selkov<sup>2</sup>, Vladislav Baranov<sup>1</sup> and Anton Kiselev<sup>1,\*</sup>**

<sup>1</sup> Department of Genomic Medicine, D.O. Ott Research Institute of Obstetrics, Gynecology and Reproductology, Mendelevskaya Line 3, 199034 Saint-Petersburg, Russia; A.E. [egorova\\_anna@yahoo.com](mailto:egorova_anna@yahoo.com); S.Sh. [sofia.shtykalova@gmail.com](mailto:sofia.shtykalova@gmail.com); M.M. [marianna0204@gmail.com](mailto:marianna0204@gmail.com); N.S. [natashved@mail.ru](mailto:natashved@mail.ru); D.D. [dimi02121@gmail.com](mailto:dimi02121@gmail.com); V.S. [baranov@vb2475.spb.edu](mailto:baranov@vb2475.spb.edu); A.K. [ankiselev@yahoo.co.uk](mailto:ankiselev@yahoo.co.uk)

<sup>2</sup> Department of Immunology and Intercellular Interactions, D.O. Ott Research Institute of Obstetrics, Gynecology and Reproductology, Mendelevskaya Line 3, 199034 Saint-Petersburg, Russia; A.S. [a\\_selutin@yahoo.com](mailto:a_selutin@yahoo.com); S.S. [selkovsa@mail.ru](mailto:selkovsa@mail.ru)

\* Correspondence: [ankiselev@yahoo.co.uk](mailto:ankiselev@yahoo.co.uk)

## Contents

**Table S1.** Molecular weight of the R6p carrier measured using MALDI-TOF mass-spectrometry.....3

**Table S2.** Molecular weight of the R6p-cRGD carrier measured using MALDI-TOF mass-spectrometry.....4

**Table S1.** Molecular weight of the R6p carrier measured using MALDI-TOF mass-spectrometry. n.d. - not detected.

| Molecular weight, Da |              | Polymerization rate |
|----------------------|--------------|---------------------|
| theoretical          | experimental |                     |
| 2871.44              | 2867.3       | (R6) <sub>2</sub>   |
| 4307.16              | 4298.82      | (R6) <sub>3</sub>   |
| 5742.88              | 5732.63      | (R6) <sub>4</sub>   |
| 7178.6               | 7160.65      | (R6) <sub>5</sub>   |
| 8614.32              | 8871.83      | (R6) <sub>6</sub>   |
| 10050.04             | 9485.35      | (R6) <sub>7</sub>   |
| 11485.76             | 11330.87     | (R6) <sub>8</sub>   |
| 12921.48             | n.d.         | (R6) <sub>9</sub>   |
| 14357.2              | 14809.73     | (R6) <sub>10</sub>  |
| 15792.92             | 15986.75     | (R6) <sub>11</sub>  |
| 17228.64             | 17329.89     | (R6) <sub>12</sub>  |
| 18664.36             | 19056.81     | (R6) <sub>13</sub>  |
| 20100.08             | 20447.93     | (R6) <sub>14</sub>  |
| 21535.8              | n.d.         | (R6) <sub>15</sub>  |
| 22971.52             | 22301.45     | (R6) <sub>16</sub>  |
| 24407.24             | 24514.12     | (R6) <sub>17</sub>  |
| 25842.96             | 25673.97     | (R6) <sub>18</sub>  |
| 27278.68             | 27427.64     | (R6) <sub>19</sub>  |

**Table S2.** Molecular weight of the R6p-cRGD carrier measured using MALDI-TOF mass-spectrometry.

| Molecular weight, Da |              | Polymerization rate           |
|----------------------|--------------|-------------------------------|
| theoretical          | experimental |                               |
| 2184.51              | 2181.07      | (R6)-cRGD                     |
| 2933.3               | 2866.63      | cRGD-(R6)-cRGD                |
| 2871.44              | 2871.28      | (R6) <sub>2</sub>             |
| 3620.23              | 3460.36      | (R6) <sub>2</sub> -cRGD       |
| 7927.39              | 7387.04      | (R6) <sub>5</sub> -cRGD       |
| 8614.32              | 8480.05      | (R6) <sub>6</sub>             |
| 8676.18              | 8676.99      | cRGD-(R6) <sub>5</sub> -cRGD  |
| 9363.11              | 9719.7       | (R6) <sub>6</sub> -cRGD       |
| 10111.9              | 9883.27      | cRGD-(R6) <sub>6</sub> -cRGD  |
| 10798.83             | 10572.81     | (R6) <sub>7</sub> -cRGD       |
| 12234.55             | 12394.15     | (R6) <sub>8</sub> -cRGD       |
| 12983.34             | 13354.83     | cRGD-(R6) <sub>8</sub> -cRGD  |
| 14419.06             | 14398.1      | cRGD-(R6) <sub>9</sub> -cRGD  |
| 15854.78             | 16001.11     | cRGD-(R6) <sub>10</sub> -cRGD |
| 16541.71             | 16323.56     | (R6) <sub>11</sub> -cRGD      |
| 17290.5              | 17383.41     | cRGD-(R6) <sub>11</sub> -cRGD |
| 17977.43             | 17383.41     | (R6) <sub>12</sub> -cRGD      |
| 19413.15             | 19499.59     | (R6) <sub>13</sub> -cRGD      |
| 20161.94             | 20563.55     | cRGD-(R6) <sub>13</sub> -cRGD |
| 21535.8              | 21402.16     | (R6) <sub>15</sub>            |
| 21597.66             | 21954.36     | cRGD-(R6) <sub>14</sub> -cRGD |
| 22284.59             | 22167.61     | (R6) <sub>15</sub> -cRGD      |
| 23720.31             | 23628.45     | (R6) <sub>16</sub> -cRGD      |
| 25156.03             | 25471.4      | (R6) <sub>17</sub> -cRGD      |
| 25904.82             | 25864.05     | cRGD-(R6) <sub>17</sub> -cRGD |
| 26591.75             | 26602.05     | (R6) <sub>18</sub> -cRGD      |
| 27340.54             | 27487.68     | cRGD-(R6) <sub>18</sub> -cRGD |
